# 1 **Skin transcriptome profiles associated with coat color in goat**

2 Yongdong Peng<sup>1</sup>, Xiaohui Liu<sup>2</sup>, Liying Geng<sup>1</sup>, Chuansheng Zhang<sup>1</sup>, Zhengzhu  
3 Liu<sup>1</sup>, Yuanfang Gong<sup>1</sup>, Hongqiang Li<sup>1</sup>, Xianglong Li<sup>1\*</sup>

4 1 College of Animal Science and Technology, Hebei Normal University of  
5 Science and Technology, Qinhuangdao, 066004, Hebei, People's Republic of  
6 China.

7 2 College of Animal Science and Technology, Agricultural University of Hebei  
8 Province, Baoding, 071001, Hebei, People's Republic of China.

9 \* Corresponding authors: College of Animal Science and Technology, Hebei  
10 Normal University of Science and Technology, No.360 Hebei street,  
11 Qinhuangdao, 066004, Hebei, People's Republic of China.E-mail:  
12 lixianglongcn@yahoo.com.

13

## 14 **ABSTRACT**

15 Capra hircus, an economically important livestock, plays an indispensable  
16 role in the world animal fiber industry. To identify additional genes that may  
17 play important roles in coat color regulation, Illumina/Solexa high throughput  
18 sequencing technology was used to catalog the global gene expression  
19 profiles in the skin of three different coat colors goat (Lubei white goat (white),  
20 Jining gray goat (gray) and Jianyang big ear goat (brown)). The RNA-Seq  
21 analysis generated 83174342, 70222592 and 52091212 clean reads in white  
22 skin, gray skin and brown skin, respectively, which provided abundant data for  
23 further analysis. A total of 91 genes were differentially expressed between the  
24 gray skin and white skin libraries, with 74 upregulated and 17 genes  
25 downregulated. Between the brown skin and white skin libraries, there were 23

26 upregulated genes and 44 downregulated genes, while there were 33  
 27 upregulated genes and 121 downregulated genes between the brown skin and  
 28 gray skin libraries. To our surprise, *MC1R*, *MITF*, *TYR*, *KIT* and *KITLG* showed  
 29 no significant difference in the skin of three different coat colors and the  
 30 expression of *ASIP* was only detected in white skin and not in gray and brown  
 31 skins. The expression of *PMEL*, *TRPM1*, *DCT*, *TYRP1* and *ELOVL3* was  
 32 validated by real-time quantitative polymerase chain reaction (qPCR) and the  
 33 results of the qPCR were consistent with the RNA-seq except the expression  
 34 of *TYRP1* between the gray skin and white skin libraries. This study provides  
 35 several candidate genes that may be associated with the development of  
 36 different coat colors goat skin. More importantly, the fact that the *ASIP* gene  
 37 was only detected in the white skin and not in the other dark skins and the  
 38 *MC1R* gene showed no significant difference in expression between the three  
 39 different coat colors goat is of particular interest for future studies that aim to  
 40 elucidate their functional role in the regulation of skin color. These results will  
 41 expand our understanding of the complex molecular mechanisms of skin  
 42 physiology and melanogenesis in goat and provide a foundation for future  
 43 studies.

44

45 **KEYWORDS:** goat skin; coat color; transcriptome; gene expression;  
 46 melanogenesis

47

48 The domestic goat (*Capra aegagrus hircus*) is a subspecies of  
 49 goat domesticated from the wild goat of southwest Asia and Eastern Europe.  
 50 The goat is a member of the family Bovidae and is closely related to

51 the sheep as both are in the goat-antelope subfamily Caprinae. Goats have  
52 long been used for their milk, meat, hair and skins throughout the world (Wang  
53 *et al.* 2011a; Wang *et al.* 2011b; Xu *et al.* 2013).

54 *Capra hircus*, an economically important livestock, plays an indispensable  
55 role in the world animal fiber industry. Fiber diameter, length and color are key  
56 traits contributing to the economic value of goat and are determined by both  
57 genetics (Bunge *et al.* 1996; Lamoreux *et al.* 2001) and other factors, including  
58 the environment and certain drugs (Kidson and Fabian 1981; Dereure 2001;  
59 Jablonski and Chaplin 2010; Sturm and Duffy 2012). Factors that determine  
60 coat color in goat are becoming of increasing interest. White fleece holds  
61 greatest economic value due to its ability to be dyed to virtually any color,  
62 where as interest in natural colors is increasing due to the green revolution and  
63 consumer preference for natural products.

64 In adult animals, both hair and skin color depend on pigment produced by  
65 melanocytes at the base of the epithelium (Cieslak *et al.* 2011). Melanocytes in  
66 mammals and birds produce two types of melanin, black to brown eumelanin  
67 and yellow to reddish brown pheomelanin (Ito *et al.* 2000; Ito and Wakamatsu  
68 2008). The basic coat colourations are defined by the ratio of the two pigments  
69 eumelanin and pheomelanin (Cieslak *et al.* 2011).

70 In animals, melanic coloration is often genetically determined and  
71 associated with various behavioral and physiological traits, suggesting that  
72 some genes involved in melanism may have pleiotropic effects (Ducrest *et al.*  
73 2008). At present, a large number of genes have been found to play  
74 well-known roles in pigmentation and the analysis of these genes has  
75 identified many single nucleotide polymorphisms (SNPs), e.g., *ASIP*, *MC1R*,

76 *TYR, TYRP1, DCT, MITF, KIT, KITLG, OCA2, SLC24A4, PMEL* (Brunberg *et*  
77 *al.* 2006; Gutierrez-Gil *et al.* 2007; Sulem *et al.* 2007; Deng *et al.* 2009; Nan *et*  
78 *al.* 2009; Duffy *et al.* 2010; Minvielle *et al.* 2010; Nicoloso *et al.* 2012; Hart *et al.*  
79 2013; Fan *et al.* 2014; Li *et al.* 2014; Becker *et al.* 2015).

80 Coat color genes are good candidates for facilitation of trace ability of  
81 animal breeds. Several previous studies have paid significant attention to the  
82 coat color of animals and showed that this color is determined by the amount  
83 and type of melanin produced and released by the melanocytes present in the  
84 skin (Ito *et al.* 2000; Ito and Wakamatsu 2008). For example, recent  
85 researches have demonstrated that *MC1R* and *ASIP* are known to be major  
86 regulators of coat color in mice and *MC1R* and *ASIP* loci are functionally linked  
87 to undesirable coat color phenotypes in sheep (Vage *et al.* 1999; Slominski *et*  
88 *al.* 2004; Steingrimsson *et al.* 2006; Norris and Whan 2008). In addition,  
89 tyrosinase-related protein 1 (*TYRP1*) is a strong positional candidate gene for  
90 color variation in Soay sheep (Gratten *et al.* 2007). Recent studies have  
91 combined SNP analysis and gene expression profiling to dissect the basis for  
92 the piebald pigmentation phenotype in Merino sheep (Garcia-Gamez *et al.*  
93 2011). It was reported that color variation was likely to stem from differences in  
94 the expression levels of genes belonging to the melanocortin in the tawny owl  
95 (Emaresi *et al.* 2013). Despite considerable knowledge of the genetic  
96 regulation of coat color in some animals, the molecular and cellular  
97 mechanisms regulating coat color in fiber-producing species, such as the goat,  
98 are not completely understood. This information is critical not only to enhanced  
99 basic understanding of regulation of melanogenesis, but also to the  
100 identification of novel pharmacological and molecular genetics approaches to

101 regulate or select for coat color in fiber producing species.

102 RNA-Seq technology is a high-throughput sequencing platform allowing  
103 us to detect transcripts with low abundance, identify novel transcript units, and  
104 reveal their differential expression between different samples (Wang *et al.*  
105 2009; Wilhelm and Landry 2009; Ozsolak and Milos 2011). To investigate the  
106 different expression profiles of the genes involved in goat skin pigmentation  
107 and gain insight into molecular mechanisms responsible for biochemistry of  
108 skin and fibers (including pigmentation) in animals producing hair, we  
109 investigated the transcriptome profiles in skin of goat of different coat colors  
110 using high throughput RNA deep sequencing. This will enable us to  
111 understand the molecular mechanisms involved in skin pigmentation and  
112 provide a valuable theoretical basis for the selection of the excellent natural  
113 colors trait.

114

## 115 **MATERIALS AND METHODS**

116

### 117 **Ethics Statement**

118 All of the animals were handled in strict accordance with good animal practices  
119 as defined by the relevant national and/or local animal welfare bodies. The  
120 experimental procedure was approved by the Animal Care and Use  
121 Committee of Hebei Normal University of Science and Technology, China and  
122 was performed in accordance with the animal welfare and ethics guidelines.

123

### 124 **Goat skin sampling and total RNA extraction**

125 Housing and care of goat and collection of skin samples for use in the

described experiments were conducted in accordance with the International Guiding Principles for Biomedical Research Involving Animals ([http://www.cioms.ch/frame\\_1985\\_texts\\_of\\_guidelines.htm](http://www.cioms.ch/frame_1985_texts_of_guidelines.htm)). The animals were locally anaesthetized with hydrochloridum (1.5 ml of 3%, i.h.), following the approval provided by the Animal Hospital of Hebei Normal University of Science and Technology to decrease the animal suffering. 3 Lubei white goats, 3 Jining gray goats and 3 Jianyang big ear goats were selected for sample collection from the goat farm in Laiwu, Shandong province, China. A piece of skin (8 mm in diameter) from the leg was collected via punch skin biopsy under local anesthesia and immediately placed in liquid nitrogen. Total RNA from the sample was extracted using Trizol reagent (Invitrogen, USA) according to the manufacturer's instructions. The RNA integrity was evaluated by gel electrophoresis and the RNA purity was checked by the ratio of OD260/OD280 and RIN value. RNA samples with RIN value greater than 7.5 and OD260/OD280 ratio greater than 1.75 were selected for goat sequencing.

141

## 142 **Library generation and sequencing**

Three RNA samples from white, gray and brown goat skin were pooled before mRNA isolation. Sequencing libraries were generated using NEBNext® Ultra™ RNA Library Prep Kit for Illumina® (NEB, USA) following manufacturer's recommendations and index codes were added to attribute sequences to each sample. Briefly, mRNA was purified from total RNA using poly-T oligo-attached magnetic beads. Fragmentation was carried out using divalent cations under elevated temperature in NEBNext First Strand Synthesis Reaction Buffer ( 5X ) . First strand cDNA was synthesized using

151 random hexamer primer and M-MuLV Reverse Transcriptase (RNase H<sup>-</sup>).  
 152 Second strand cDNA synthesis was subsequently performed using DNA  
 153 Polymerase I and RNase H. Remaining overhangs were converted into blunt  
 154 ends via exonuclease/polymerase activities. After adenylation of 3'ends of  
 155 DNA fragments, NEBNext Adaptor with hairpin loop structure were ligated to  
 156 prepare for hybridization. In order to select cDNA fragments of preferentially  
 157 150~200 bp in length, the library fragments were purified with AMPure XP  
 158 system (Beckman Coulter, Beverly, USA). Then 3 µl USER Enzyme (NEB,  
 159 USA) was used with size-selected, adaptor-ligated cDNA at 37°C for 15 min  
 160 followed by 5 min at 95 °C before PCR. Then PCR was performed with  
 161 Phusion High-Fidelity DNA polymerase, Universal PCR primers and Index (X)  
 162 Primer. At last, PCR products were purified (AMPure XP system) and library  
 163 quality was assessed on the Agilent Bioanalyzer 2100 system.

164 The clustering of the index-coded samples was performed on a cBot  
 165 Cluster Generation System using TruSeq PE Cluster Kit v3-cBot-HS (Illumia)  
 166 according to the manufacturer's instructions. After cluster generation, the  
 167 library preparations were sequenced on an Illumina Hiseq 2000 platform and  
 168 100 bp paired-end reads were generated.

169

## 170 **Reads mapping to the reference genome**

171 Reference genome and gene model annotation files were downloaded from  
 172 genome website directly. Index of the reference genome was built using  
 173 Bowtie v2.0.6 and paired-end clean reads were aligned to the reference  
 174 genome using TopHat v2.0.9. We selected TopHat as the mapping tool for that  
 175 TopHat can generate a database of splice junctions based on the gene model

176 annotation file and thus a better mapping result than other non-splice mapping  
177 tools.

178

## 179 **Differential expression analysis**

180 The expression abundance of each assembled transcript was measured  
181 through Reads Per Kilobase of exon model per Million mapped reads (RPKM).  
182 Prior to differential gene expression analysis, for each sequenced library, the  
183 read counts were adjusted by edgeR program package through one scaling  
184 normalized factor. Differential expression analysis of two conditions was  
185 performed using the DEGSeq R package (1.12.0). The P values were adjusted  
186 using the Benjamini & Hochberg method. Corrected P-value of 0.005 and  
187 log2(Fold change) of 1 were set as the threshold for significantly differential  
188 expression.

189

## 190 **GO and KEGG enrichment analysis of differentially expressed genes**

191 Gene Ontology (GO) enrichment analysis of differentially expressed genes  
192 was implemented by the Goseq R package, in which gene length bias was  
193 corrected. GO terms with corrected Pvalue less than 0.05 were considered  
194 significantly enriched by differential expressed genes. KEGG is a database  
195 resource for understanding high-level functions and utilities of the biological  
196 system, such as the cell, the organism and the ecosystem, from  
197 molecular-level information, especially large-scale molecular datasets  
198 generated by genome sequencing and other high-through put experimental  
199 technologies (<http://www.genome.jp/kegg/>). We used KOBAS software to test  
200 the statistical enrichment of differential expression genes in KEGG pathways.



201

## 202 **Real-time quantitative RT-PCR**

203 The expression of these genes was quantified by qRT-PCR using QuantiTect  
 204 SYBR Green RT-PCR (Qiagen, Waltham, MA). Information regarding the  
 205 primers of *PMEL*, *TRPM1*, *DCT*, *TYRP1*, *ELOVL3* used for the qPCR can be  
 206 found in Table 1. *GAPDH* was used as housekeeping gene. Quantitative  
 207 real-time PCR was performed in triplicate on the Stratagene iQ5 system. The  
 208 20 µL PCR reaction included 10 µL SYBR Premix Ex Taq II (TaKaRa,  
 209 Dalian, China), 0.5 µL specific forward primer, 0.5 µL reverse primer, 0.4 µL  
 210 ROX reference dye, 0.5 µL diluted cDNA and 8.6 µL RNase free water. Cycling  
 211 parameters were 95°C for 4 min, followed by 40 cycles of 95°C for 15 sec,  
 212 56°C or 58°C for 30 sec and 72°C for 45 sec. Melting curve analyses were  
 213 performed following amplifications. At the end of the cycles, melting  
 214 temperatures of the PCR products was determined between 70°C and 90°C.  
 215 The iQ5 software (Bio-Rad) was used for detection of fluorescent signals and  
 216 melting temperature calculations. Quantification of selected mRNA transcript  
 217 abundance was performed using the comparative threshold cycle (CT) method.  
 218 The difference in abundance of mRNA for the genes was determined by  
 219 analysis of variance.

220

## 221 **DATA AVAILABILITY**

222 Table S1 contains top 30 highly expressed genes in goat skin. Table S2 covers  
 223 differentially expressed genes between the gray and white skin. Table S3  
 224 covers differentially expressed genes between the brown and white skin. Table  
 225 S4 covers differentially expressed genes between the brown and gray skin.

226 Table S5 contains the list of GO categories for DEGs between different coat  
227 colors goat skin. Table S6 encompass KEGG pathway analysis for the gray  
228 and white skin differentially expressed genes. Table S7 encompass KEGG  
229 pathway analysis for the brown and white skin differentially expressed genes.  
230 Table S8 encompass KEGG pathway analysis for the brown and gray skin  
231 differentially expressed genes.

232

## 233 **RESULTS**

234

### 235 **Massively Sequencing and Aligning to the Reference Genome**

236 To maximise the coverage of the three different coat colors goat (Lubei white  
237 goat (white), Jining gray goat (gray) and Jianyang big ear goat (brown)) skin  
238 mRNA by RNA sequencing, RNA libraries were constructed by pooling RNA  
239 isolated from different coat colors individuals as a sample library. These  
240 RNA-Seq libraries generated over 54 million raw reads from each library. After  
241 filtering the only adaptor sequences, those containing N sequences and low  
242 quality sequences, the three RNA-Seq libraries still generated over 26 million  
243 paired-end clean reads in each library, and the percentage of paired-end clean  
244 reads among raw tags in each library ranged from 94.07% to 94.71% (Table 2  
245 and Figure 1).

246 Of the total reads, more than 77% matched either to a unique or to  
247 multiple genomic locations; the remaining were unmatched (Table 3), because  
248 only reads aligning entirely inside exonic regions will be matched (reads from  
249 exon-exon junction regions will not be matched). Of the total mapped, more  
250 than 78% matched to exon and more than 11% matched to intron; the

251 remaning were matched the intergenic (Figure 2).

252

### 253 **Genes highly expressed in goat skin**

254 The top 30 genes most highly expressed in goat skin included genes of the  
255 keratin family and ribosomal proteins (Table S1). The most highly expressed  
256 gene in all three different coat colors goat skin was keratin associated protein  
257 3-1. The other highly expressed genes in the different coat color goat skins  
258 included, trichohyalin, transcript variant X1, keratin 71, keratin 5, keratin 25,  
259 eukaryotic translation elongation factor 1 alpha 1, keratin 14, transcript variant  
260 X1, keratin 27, keratin, type II microfibrillar, component 7C-like, collagen, type I,  
261 alpha 1, uncharacterized LOC102168701, ribosomal protein L35, secreted  
262 protein, acidic, cysteine-rich (osteonectin), ribosomal protein L13a. The list of  
263 most highly expressed genes also included 2 unknown genes.

264

### 265 **Differentially expressed genes in different coat colors goat skin**

266 To identify the differentially expressed genes (DEGs) of different coat colors  
267 goat skin, the differences in gene expression patterns were analysed for the  
268 pairs of the gray skin and white skin, the brown skin and white skin, the brown  
269 skin and gray skin. There were a total of 89 known genes and 2 novel genes  
270 identified as differentially expressed in gray skin versus white skin, of which 17  
271 were down-regulated and 74 (including 2 novel genes) were up-regulated in  
272 skin from gray goat compared with skin from white goat (Figure 3 and Table  
273 S2). Between the brown and white libraries, 67 genes (including 1 novel gene)  
274 were differentially expressed, including 44 down-regulated (including 1 novel  
275 gene) and 23 up-regulated genes (Figure 3 and Table S3). When we

276 compared the brown and gray libraries, 154 DEGs (including 6 novel genes)  
277 were found, with 121 down-regulated (including 5 novel genes) and 33  
278 up-regulated (including 1 novel gene) (Figure 3 and Table S4 ). This suggests  
279 that the differentiation of expressed genes between the brown skin and gray  
280 skin is larger than that between the gray skin and white skin, while a relatively  
281 smaller differentiation arises between the brown skin and white skin.

282

### 283 **Functional Classification Analysis**

284 For the GO analysis of the gray versus white skin, 1249, 349 and 607  
285 differentially expressed genes were grouped in biological process, cellular  
286 component and molecular function, respectively. Most of the differentially  
287 expressed genes were classified into two GO categories (single-organism  
288 metabolic process, oxidoreductase activity and catalytic activity; Figure 4 and  
289 Table S5). The majority of the GO terms including pigmentation do not appear  
290 to be significantly enriched in the differentially expressed genes. For the GO  
291 analysis of brown versus white skin, 505, 326 and 391 differentially expressed  
292 genes were grouped in biological process, cellular component and molecular  
293 function, respectively. Most of the differentially expressed genes were  
294 classified into three GO categories (oxidation-reduction process, extracellular  
295 region and structural molecule activity; Figure 4 and Table S5). The majority of  
296 the GO terms including pigmentation do not appear to be significantly enriched  
297 in the differentially expressed genes. For the GO analysis of brown versus  
298 white skin, 2368, 761 and 1100 differentially expressed genes were grouped in  
299 biological process, cellular component and molecular function, respectively.  
300 Most of the differentially expressed genes were classified into two GO

categories (oxidation-reduction process, single-organism metabolic process and oxidoreductase activity; Figure 4 and Table S5). The majority of the GO terms including pigmentation do not appear to be significantly enriched in the differentially expressed genes.

In order to validate the transcriptome sequencing results, we selected 5 genes at random for real time PCR to determine their relative expression in different coat color goat skin. These genes, identified as differentially expressed in different coat color goat skin based on transcriptome sequencing analysis. The results of the qPCR were consistent with the RNA-seq except the expression of *TYRP1* between the gray skin and white skin libraries (Figure 5).

311

### 312 **KEGG pathway analysis**

KEGG is a largely publicly available pathway-related database and is useful in searching for genes involved in metabolic or signal transduction pathways that were significantly enriched (Kanehisa *et al.* 2008). Of the 89 known genes differentially expressed in gray versus white goat skin, 40 had a specific KEGG pathway annotation. Of these KEGG pathway annotated genes, 3 were down-regulated in gray goat skin. These down-regulated genes are mainly involved in cysteine and methionine metabolism, melanogenesis, ribosome, metabolic pathways. Remaining KEGG pathway annotated genes were associated with 61 pathways including those functionally related to coat color in skin such as tyrosine metabolism (Table S6).

Between the brown and white goat skin, 23 DEGs with a KEGG pathway annotation were found and 14 were down-regulated in brown goat skin. These down-regulated genes were associated with 41 pathways including those

functionally related to coat color in skin such as melanogenesis. Remaining KEGG pathway annotated genes were associated with 31 pathways including those functionally related to coat color in skin such as melanogenesis, tyrosine metabolism (Table S7).

Between the brown and gray goat skin, 72 DEGs with a KEGG pathway annotation were found and 63 were down-regulated in brown goat skin. These down-regulated genes were associated with 98 pathways including those functionally related to coat color in skin such as tyrosine metabolism. Remaining KEGG pathway annotated genes were associated with 29 pathways including those functionally related to coat color in skin such as melanogenesis, tyrosine metabolism (Table S8).

### **Differential expression of known coat color genes**

Approximately 171 cloned genes involved in different pathways controlling coat color formation have been identified in the mouse (<http://www.espcr.org/micemut/#cloned>). Those known coat color genes are routinely classified into six general functions including: Melanocyte development, Components of melanosomes and their precursors, Melanosome construction/protein routing, Melanosome transport, Eumelanin and pheomelanin and Systemic effects (Bennett and Lamoreux 2003). Expression of a total of 128 of aforementioned coat color genes was detected in goat skin in present studies, and 2 genes showed higher expression in gray goat skin versus white goat skin and 1 gene showed higher expression in white goat skin, 4 genes showed higher expression in brown goat skin versus white goat skin and 1 gene showed higher expression in white goat skin, 4 genes showed

351 higher expression in brown goat skin versus gray goat skin. Interestingly, the  
 352 expression of *ASIP* (agouti signaling protein) were almost not detected in the  
 353 gray skin and the brown skin, but there was high expression in the white goat  
 354 skin for *ASIP*. *PMEL*, *DCT*, *TRPM1* and *TYRP1* were significantly up-regulated  
 355 in brown goat skin (brown vs white, brown vs gray), but *DCT*, *TRPM1* and  
 356 *TYRP1* showed no differences in expression between the gray and white skin  
 357 samples and only *PMEL* was significantly up-regulated in gray goat skin  
 358 versus white goat skin. *ELOVL3* was significantly up-regulated in gray goat  
 359 skin (gray vs white, brown vs gray). However, there were no significant  
 360 differences in the expression of *ELOVL3* between the brown and white skin  
 361 samples. *MC1R*, *MITF*, *TYR*, *KIT* and *KITLG* showed no differences when  
 362 comparing the three different coat color groups. The genes associated with  
 363 oculocutaneous albinism (OCA) such as *HPS1*, *HPS3*, *HPS4*, *HPS5* and  
 364 *HPS6* were expressed in goat skin but all of them did not show differential  
 365 expression associated with coat color.

366

## 367 **DISCUSSION**

368 Mammalian coat color exhibits a wide range of shades and is dictated by  
 369 melanin production in melanocytes (melanogenesis). Melanogenesis involves  
 370 a complex molecular regulation (Slominski *et al.* 2004). In order to understand  
 371 the molecular mechanisms of coat color formation, previous studies have  
 372 reported the global gene expression profiles in skin of sheep and chicken with  
 373 white versus black skin through Illumina sequencing technology (Fan *et al.*  
 374 2013; Zhang *et al.* 2015). Another study examined differences in gene

375 expression associated with black spots infleece of Corriedale sheep using  
376 microarray technology (Penagaricano *et al.* 2012).

377 Our study offers new information related to gene expression profiles for  
378 three different coat colors goat skin. Our data analysis was based on the NCBI  
379 database of the goat reference genome (*Capra hircus* (assembly CHIR\_1.0)).

380 To further investigate genes that may play important roles in goat skin,  
381 particularly in fiber/coat pigmentation, over 200 million transcriptome sequence  
382 reads were generated from different coat colors goat skin using high  
383 throughput RNA deep sequencing. From these reads there were 24,086  
384 known genes identified as expressed in goat skin, among which 89 were  
385 differentially expressed in gray versus white goat skin, 66 were differentially  
386 expressed in brown versus white goat skin and 148 were differentially  
387 expressed in brown versus gray goat skin. It is acknowledged that study  
388 design was not optimal due to limited biological replication because single  
389 pooled samples (n=3 per coat color) were used in transcriptome sequencing  
390 analysis and the same three samples from different coat colors goat skin were  
391 used individually for quantitative real time PCR validation of the sequencing  
392 results. Despite such limitations, results have significantly enhanced  
393 understanding of goat skin transcriptome composition and potential  
394 differences in gene expression associated with coat color that are foundational  
395 to further study in the future.

396 Genes encoding for keratin family members and keratin associated  
397 proteins, ribosomal proteins were among the most highly expressed genes  
398 detected in goat skin. Of the top 30 highly expressed genes in goat skin, all 9  
399 keratin family members and keratin associated proteins displayed no



400 difference between the three different coat colors goat skin. Hair keratins  
 401 contain a much higher content of cysteine residues in their non-helical  
 402 domains and thus form tougher and more durable structures via inter  
 403 molecular disulfide bond formation (Mogosanu *et al.* 2014). Therefore, high  
 404 expression of keratins is likely crucial for fleece strength. The ribosome is a  
 405 central player in the translation system and its function is to decode the  
 406 nucleotide sequence carried by the mRNA and convert it into an amino acid  
 407 primary structure (Marshall *et al.* 2008). Abundant presence of ribosomal  
 408 proteins in goat skin suggests the importance of high rates of protein  
 409 translation in goat skin. In channel catfish skin, the expression of ribosomal  
 410 proteins was high presumably due to higher levels of translational activities  
 411 (Karsi *et al.* 2002; Patterson *et al.* 2003). It was also found that several  
 412 collagen family members, particularly collagen, type I family members, were  
 413 high expression in the three different coat colors goat skin. Collagen, in the  
 414 form of elongated fibrils, is mostly found in fibrous tissues such as tendons,  
 415 ligaments and skin (Zuber *et al.* 2015). Collagen has many medical uses in  
 416 treating complications of the bones and skin. So high expression collagen may  
 417 play important physiological function for skin. The expression of trichohyalin,  
 418 transcript variant X1 was also high expression in the three different coat colors  
 419 goat skin. Trichohyalin confers mechanical strength to the hair follicle inner  
 420 root sheath and to other toughened epithelial tissues, such as the hard palate  
 421 and filiform ridges of the tongue, by forming multiple complex crosslinks with  
 422 itself and with other structural proteins (Steinert *et al.* 2003), therefore high  
 423 expression trichohyalin plays important role in hair follicle development.

424 The GO and KEGG pathway analyses of differentially expressed genes

revealed that most were associated with the function of single-organism metabolic process, oxidoreductase activity and oxidation-reduction process ontology categories. Of particular interest in our dataset were pathways related to pigmentation and melanogenesis. In this study, in terms of the molecular function category, 3 significant genes were found to be involved in melanogenesis and 3 significant genes were found to be involved in tyrosine metabolism. All these results provide strong evidence that there is a significant difference in the level of melanogenesis between the different coat colors goat skin. However, further investigation is still needed to confirm the regulatory relationships of these genes.

Melanocortin-1 receptor (*MC1R*) is responsible for binding melanocyte stimulating hormone (MSH), which is expressed by stressed keratinocytes, and initiating the cascade of melanogenesis (Solano *et al.* 2006). *MC1R* has classically been considered to play a role in and be the irreplaceable target involved in regulating mammalian skin pigmentation and hair color (Roberts *et al.* 2006; Schaffler *et al.* 2006; Lalueza-Fox *et al.* 2007). Recently, a study found that there is no association between *MC1R* polymorphisms and plumagecoloration in the zebra finch (Hoffman *et al.* 2014) which is consistent with another study that was performed in leaf warblers (Macdougall-Shackleton *et al.* 2003). Another recently study also indicated that the coat color variation observed in rhesusmacaques (variation from light to dark) is unlikely to be due to differences in the expression levels of the *MC1R* gene. In a recent microarray experiment, no significant differences in the expression of *MC1R* were observed between the white skin and black spots of sheep (Penagaricano *et al.* 2012). There were no significant differences in the

450 expression of *MC1R* between the black-skinned and white-skinned Lueyang  
451 chickens (Zhang *et al.* 2015). Similarly and to our surprise, *MC1R* showed no  
452 significant differences in expression between the three different coat colors  
453 goat used in this study. The specific function and role of *MC1R* in pigmentation  
454 still requires further research.

455 The gene for agouti signaling protein (*ASIP*) is centrally involved in the  
456 expression of coat-color traits in animals. Previous studies have shown that  
457 the *ASIP* gene is responsible for the skin color of both white and black-coated  
458 sheep (Norris and Whan 2008) and the *ASIP* CNV were association with coat  
459 color in Tibetan sheep (Han *et al.* 2015). A mutation in *ASIP* causes the  
460 black-and-tan pigmentation phenotype observed pigs (Drogemuller *et al.*  
461 2006), A missense mutation in the agouti signaling protein gene (*ASIP*) is  
462 associated with the no light points coat phenotype in donkeys (Abitbol *et al.*  
463 2015). In our study, *ASIP* was found to show significantly different expression  
464 levels in the gray-skinned goats versus the white-skinned goats and the  
465 brown-skinned goats versus the white skinned goats, while *ASIP* was only  
466 detected in the white skin and almostly not detected in the gray skin and brown  
467 skin. The result that *ASIP* only was detected in the white skin and not in the  
468 dark skins seems to be inconsistent with the previous study, which has shown  
469 that the expression of the *ASIP* gene was also significantly greater in the  
470 black-skinned compared to the white-skinned chickens (Zhang *et al.* 2015).  
471 *ASIP* may play important role in the pigmentation of goat and further  
472 investigations are still needed to confirm the mechanism of *ASIP*.

473 *TYRP1*, one of themembers of the tyrosinase family, is a I type membrane  
474 bound protein that is expressed in both melanocytes and the retinal epithelium.

475 *TYRP1* is involved in the distal eumelanic pathway and plays a role in  
 476 stabilizing TYR, which is the critical and rate-determining enzyme in  
 477 melanogenesis (Kobayashi *et al.* 1998). There existed a significant association  
 478 between coat color and *TYRP1* in Soay sheep. In the free-living Soay sheep,  
 479 coat color is either dark brown or light tawny color. The light phenotype is  
 480 determined by homozygosity of a single recessive amino acid change (G→T  
 481 transversion) at coding position 869 in the *TYRP1* gene (Gratten *et al.* 2007).  
 482 This is consistent with studies in domestic sheep, where light coat color is  
 483 known to be due to a decrease in the ratio of eumelanin to pheomelanin,  
 484 relative to black coat color (Aliev *et al.* 1990). In Bionda dell'Adamello goat, the  
 485 genotype frequency distribution of a non-synonymous SNP (G1112A)  
 486 suggested a possible role of *TYRP1* in brown eumelanic goat coat colour  
 487 (Nicoloso *et al.* 2012). The brown coat colour of Coppernecked goats is  
 488 associated with a non-synonymous variant (p.Gly496Asp) at the *TYRP1* locus  
 489 (Becker *et al.* 2015). In our study, *TYRP1* were significantly up-regulated in  
 490 brown goat skin (brown vs white, brown vs gray) and *TYRP1* showed no  
 491 differences in expression between the gray and white skin samples using high  
 492 throughput RNA deep sequencing, but the subsequent validation were  
 493 inconsistent with our transcriptome sequencing data. The results of the qPCR  
 494 showed that *TYRP1* were significantly up-regulated in brown goat skin (brown  
 495 vs white, brown vs gray) and had significantly higher expression in gray goat  
 496 skin compared with white goat skin. These results still require additional  
 497 research.

498 *PMEL* (*SILV* or *PMEL17*) is involved in melanosomal structure and acts as  
 499 a scaffold in melanosomes by forming the proteolytic fibrillar matrix where

500 melanin is deposited (Theos *et al.* 2005). It is a prominent member of the  
501 group of dilution genes. *SILV* mutations, which result in pigment dilution, have  
502 been discovered in many animals (Kerje *et al.* 2004; Brunberg *et al.* 2006;  
503 Clark *et al.* 2006; Gutierrez-Gil *et al.* 2007; Kuhn and Weikard 2007; Hellstrom  
504 *et al.* 2011). In our study, *PMEL* were significantly up-regulated in brown goat  
505 skin (brown vs white, brown vs gray) and had significantly higher expression in  
506 gray goat skin compared with white goat skin. The results of our RNA-seq and  
507 the subsequent validation were consistent.

508 *DCT* (*TYRP2*) is a melanogenic enzyme termed DOPAchrome  
509 tautomerase, which isomerizes the pigmented intermediate DOPAchrome to  
510 DHICA (5,6-dihydroxyindole-2-carboxylic acid) rather than to DHI  
511 (5,6-dihydroxyindole) (Tsukamoto *et al.* 1992). Mutations of *DCT* were  
512 associated with coat-color variation in mice (Jackson *et al.* 1992; Budd and  
513 Jackson 1995). The mice deficient in *DCT* showed a diluted coat color  
514 phenotype (Guyonneau *et al.* 2004). Mutations in dopachrome tautomerase  
515 (*Dct*) affect eumelanin/pheomelanin synthesis (Costin *et al.* 2005). Sheep with  
516 the GG genotype of *DCT* had significantly ( $P < 0.05$ ) lower tyrosinase activity,  
517 alkali-soluble melanin content, and ratio of eumelanin: total melanin than  
518 sheep with GA and AA genotypes when measured across all investigated  
519 samples (Deng *et al.* 2009). *DCT* did not show expression in duck feather  
520 bulbs but expressed in retina (Li *et al.* 2012). Our RNA-seq and qPCR all  
521 showed that *DCT* were significantly up-regulated in brown goat skin (brown vs  
522 white, brown vs gray) and there were no significant differences in the  
523 expression of *DCT* between the gray and white skin samples.

524 *TRPM1* is a member of the transient receptor potential (TRP) channel

525 family. Although the potential effects of *TRPM1* on pigmentation have not been  
526 fully elucidated, it has been reported to be a potent regulator of pigmentation  
527 (Oancea *et al.* 2009). Moreover, it is associated with a distinct leucistic white  
528 phenotype, the so-called leopard complex spotting, which is found in some  
529 horse breeds (Bellone *et al.* 2008; Wade *et al.* 2009). Interestingly, this  
530 mutation is linked with night blindness in homozygous Appaloosa horses. In  
531 homozygous leopard spotting horses, mRNA expression of *TRPM1* is  
532 significantly downregulated in both skin and retina (Bellone *et al.* 2008; Bellone  
533 *et al.* 2010). This gene is also involved in night blindness in humans (Van  
534 Genderen *et al.* 2009; Koike *et al.* 2010). Our RNA-seq and qPCR all showed  
535 that *TRPM1* were significantly up-regulated in brown goat skin (brown vs white,  
536 brown vs gray) and there were no significant differences in the expression of  
537 *TRPM1* between the gray and white skin samples.

538 *ELOVL3* encodes a protein that belongs to the GNS1/SUR4 family.  
539 Members of this family play a role in elongation of long chain fatty acids to  
540 provide precursors for synthesis of sphingolipids and ceramides. The  
541 *Elovl3*-ablated mice displayed a sparse hair coat (Westerberg *et al.* 2004). Our  
542 RNA-seq and qPCR all showed that *ELOVL3* were significantly up-regulated in  
543 gray goat skin (gray vs white, brown vs gray) and there were no significant  
544 differences in the expression of *ELOVL3* between the brown and white skin  
545 samples.

546 *ASIP* was only detected in the white skin and not in the dark skins,  
547 therefore *ASIP* may play important role in maintaining goat white coat color.  
548 *PMEL*, *TYRP1*, *TRPM1* and *DCT* were significantly up-regulated in brown goat  
549 skin compare with the gray and white color skin, so they may play important

550 role in the formation of goat brown coat color. In addition, *ELOVL3* were  
 551 significantly up-regulated in gray goat skin compare with the brown and white  
 552 color skin and there were no significant differences in the expression of  
 553 *ELOVL3* between the brown and white skin samples. *PMEL* had significantly  
 554 higher expression in gary goat skin compared with white goat skin and it was  
 555 also found that *TYRP1* had significantly higher expression in gary goat skin  
 556 compared with white goat skin by qPCR. *ELOVL3*, *PMEL* and *TYRP1* may be  
 557 important for the goat gray coat color although the result of *TYRP1* qPCR were  
 558 inconsistent with RNA-seq. *PMEL* may be a key factor in the pigmentation of  
 559 the three different coat colors. These results still require additional research.

560

## 561 CONCLUSIONS

562 In summary, this is an original report of the transcriptome analysis of the  
 563 skin from three different coat colors goat. The present study described and  
 564 revealed a set differentially expressed known and novel genes found in goat  
 565 skin that are potentially related to skin color and other physiological functions.  
 566 The *MC1R* gene showed no difference in expression between the three  
 567 diferent coat colors and the *ASIP* gene was only detected in the white skin,  
 568 which are of particular interest for future studies to elucidate its functional roles  
 569 in the regulation of skin color. *PMEL*, *TYRP1*, *TRPM1* and *DCT* may play  
 570 important role in the formation of goat brown coat color and *ELOVL3*, *PMEL*  
 571 and *TYRP1* may be important for the goat gray coat color. Results are  
 572 foundational for future studies to potentially manipulate coat color via  
 573 pharmacological and genetic approaches.

574

## 575 ACKNOWLEDGMENTS

576 We are grateful to members of our laboratories for critical reading of the  
577 manuscript and helpful discussion. This work was supported by the National  
578 Natural Science Foundation of China (no: 31172196, 31501940), the Applied  
579 Basic Research Programs of Hebei Province (no:15962901D), College  
580 Innovation Team Leader Training Programme of Hebei Province (no:  
581 LJRC004), the Science and Technology Pillar Program of Qinhuangdao (no:  
582 201502A058) and PhD Research Start Fund of Hebei Normal University of  
583 Science and Technology (2014). RNA sequences were completed by  
584 Novogene Bioinformatics Institute.

## 585 586 LITERATURE CITED

- 587 Abitbol, M., R. Legrand and L. Turet, 2015 A missense mutation in the agouti signaling protein  
588 gene (ASIP) is associated with the no light points coat phenotype in donkeys. *Genet*  
589 *Sel Evol* 47: 28.
- 590 Aliev, G., M. Rachkovsky, S. Ito, K. Wakamatsu and A. Ivanov, 1990 Pigment types in  
591 selected color genotypes of Asiatic sheep. *Pigment Cell Res* 3: 177-180.
- 592 Becker, D., M. Otto, P. Ammann, I. Keller, C. Drogemuller *et al.*, 2015 The brown coat colour  
593 of Coppernecked goats is associated with a non-synonymous variant at the TYRP1  
594 locus on chromosome 8. *Anim Genet* 46: 50-54.
- 595 Bellone, R. R., S. A. Brooks, L. Sandmeyer, B. A. Murphy, G. Forsyth *et al.*, 2008 Differential  
596 gene expression of TRPM1, the potential cause of congenital stationary night  
597 blindness and coat spotting patterns (LP) in the Appaloosa horse (*Equus caballus*).  
598 *Genetics* 179: 1861-1870.
- 599 Bellone, R. R., G. Forsyth, T. Leeb, S. Archer, S. Sigurdsson *et al.*, 2010 Fine-mapping and  
600 mutation analysis of TRPM1: a candidate gene for leopard complex (LP) spotting and  
601 congenital stationary night blindness in horses. *Brief Funct Genomics* 9: 193-207.
- 602 Bennett, D. C., and M. L. Lamoreux, 2003 The color loci of mice--a genetic century. *Pigment*  
603 *Cell Res* 16: 333-344.
- 604 Brunberg, E., L. Andersson, G. Cothran, K. Sandberg, S. Mikko *et al.*, 2006 A missense  
605 mutation in PMEL17 is associated with the Silver coat color in the horse. *BMC Genet* 7:  
606 46.
- 607 Budd, P. S., and I. J. Jackson, 1995 Structure of the mouse tyrosinase-related  
608 protein-2/dopachrome tautomerase (Typr2/Dct) gene and sequence of two novel slaty  
609 alleles. *Genomics* 29: 35-43.
- 610 Bunge, R., D. L. Thomas, T. G. Nash and C. J. Lupton, 1996 Performance of hair breeds and  
611 prolific wool breeds of sheep in southern Illinois: wool production and fleece quality. *J*



612 Anim Sci 74: 25-30.

613 Cieslak, M., M. Reissmann, M. Hofreiter and A. Ludwig, 2011 Colours of domestication. Biol  
614 Rev Camb Philos Soc 86: 885-899.

615 Clark, L. A., J. M. Wahl, C. A. Rees and K. E. Murphy, 2006 Retrotransposon insertion in  
616 SILV is responsible for merle patterning of the domestic dog. Proc Natl Acad Sci U S A  
617 103: 1376-1381.

618 Costin, G. E., J. C. Valencia, K. Wakamatsu, S. Ito, F. Solano *et al.*, 2005 Mutations in  
619 dopachrome tautomerase (Dct) affect eumelanin/pheomelanin synthesis, but do not  
620 affect intracellular trafficking of the mutant protein. Biochem J 391: 249-259.

621 Deng, W., Y. Tan, X. Wang, D. Xi, Y. He *et al.*, 2009 Molecular cloning, sequence  
622 characteristics, and polymorphism analyses of the tyrosinase-related protein 2 /  
623 DOPACHROME tautomerase gene of black-boned sheep (*Ovis aries*). Genome 52:  
624 1001-1011.

625 Dereure, O., 2001 Drug-induced skin pigmentation. Epidemiology, diagnosis and treatment.  
626 Am J Clin Dermatol 2: 253-262.

627 Drogemuller, C., A. Giese, F. Martins-Wess, S. Wiedemann, L. Andersson *et al.*, 2006 The  
628 mutation causing the black-and-tan pigmentation phenotype of Mangalitza pigs maps  
629 to the porcine ASIP locus but does not affect its coding sequence. Mamm Genome 17:  
630 58-66.

631 Ducrest, A. L., L. Keller and A. Roulin, 2008 Pleiotropy in the melanocortin system, coloration  
632 and behavioural syndromes. Trends Ecol Evol 23: 502-510.

633 Duffy, D. L., Z. Z. Zhao, R. A. Sturm, N. K. Hayward, N. G. Martin *et al.*, 2010 Multiple  
634 pigmentation gene polymorphisms account for a substantial proportion of risk of  
635 cutaneous malignant melanoma. J Invest Dermatol 130: 520-528.

636 Emaresi, G., A. L. Ducrest, P. Bize, H. Richter, C. Simon *et al.*, 2013 Pleiotropy in the  
637 melanocortin system: expression levels of this system are associated with  
638 melanogenesis and pigmentation in the tawny owl (*Strix aluco*). Mol Ecol 22:  
639 4915-4930.

640 Fan, R., J. Xie, J. Bai, H. Wang, X. Tian *et al.*, 2013 Skin transcriptome profiles associated  
641 with coat color in sheep. BMC Genomics 14: 389.

642 Fan, Y., P. Wang, W. Fu, T. Dong, C. Qi *et al.*, 2014 Genome-wide association study for  
643 pigmentation traits in Chinese Holstein population. Anim Genet 45: 740-744.

644 Garcia-Gamez, E., A. Reverter, V. Whan, S. M. McWilliam, J. J. Arranz *et al.*, 2011 Using  
645 regulatory and epistatic networks to extend the findings of a genome scan: identifying  
646 the gene drivers of pigmentation in merino sheep. PLoS One 6: e21158.

647 Gratten, J., D. Beraldi, B. V. Lowder, A. F. McRae, P. M. Visscher *et al.*, 2007 Compelling  
648 evidence that a single nucleotide substitution in TYRP1 is responsible for coat-colour  
649 polymorphism in a free-living population of Soay sheep. Proc Biol Sci 274: 619-626.

650 Gutierrez-Gil, B., P. Wiener and J. L. Williams, 2007 Genetic effects on coat colour in cattle:  
651 dilution of eumelanin and pheomelanin pigments in an F2-Backcross Charolais x  
652 Holstein population. BMC Genet 8: 56.

653 Guyonneau, L., F. Murisier, A. Rossier, A. Moulin and F. Beermann, 2004 Melanocytes and  
654 pigmentation are affected in dopachrome tautomerase knockout mice. Mol Cell Biol 24:  
655 3396-3403.

656 Han, J. L., M. Yang, Y. J. Yue, T. T. Guo, J. B. Liu *et al.*, 2015 Analysis of agouti signaling  
657 protein (ASIP) gene polymorphisms and association with coat color in Tibetan sheep  
658 (*Ovis aries*). *Genet Mol Res* 14: 1200-1209.

659 Hart, K. L., S. L. Kimura, V. Mushailov, Z. M. Budimlija, M. Prinz *et al.*, 2013 Improved eye-  
660 and skin-color prediction based on 8 SNPs. *Croat Med J* 54: 248-256.

661 Hellstrom, A. R., B. Watt, S. S. Fard, D. Tenza, P. Mannstrom *et al.*, 2011 Inactivation of  
662 Pmel alters melanosome shape but has only a subtle effect on visible pigmentation.  
663 *PLoS Genet* 7: e1002285.

664 Hoffman, J. I., E. T. Krause, K. Lehmann and O. Kruger, 2014 MC1R genotype and plumage  
665 colouration in the zebra finch (*Taeniopygia guttata*): population structure generates  
666 artefactual associations. *PLoS One* 9: e86519.

667 Ito, S., and K. Wakamatsu, 2008 Chemistry of mixed melanogenesis--pivotal roles of  
668 dopaquinone. *Photochem Photobiol* 84: 582-592.

669 Ito, S., K. Wakamatsu and H. Ozeki, 2000 Chemical analysis of melanins and its application  
670 to the study of the regulation of melanogenesis. *Pigment Cell Res* 13 Suppl 8:  
671 103-109.

672 Jablonski, N. G., and G. Chaplin, 2010 Colloquium paper: human skin pigmentation as an  
673 adaptation to UV radiation. *Proc Natl Acad Sci U S A* 107 Suppl 2: 8962-8968.

674 Jackson, I. J., D. M. Chambers, K. Tsukamoto, N. G. Copeland, D. J. Gilbert *et al.*, 1992 A  
675 second tyrosinase-related protein, TRP-2, maps to and is mutated at the mouse slaty  
676 locus. *EMBO J* 11: 527-535.

677 Kanehisa, M., M. Araki, S. Goto, M. Hattori, M. Hirakawa *et al.*, 2008 KEGG for linking  
678 genomes to life and the environment. *Nucleic Acids Res* 36: D480-484.

679 Karsi, A., D. Cao, P. Li, A. Patterson, A. Kocabas *et al.*, 2002 Transcriptome analysis of  
680 channel catfish (*Ictalurus punctatus*): initial analysis of gene expression and  
681 microsatellite-containing cDNAs in the skin. *Gene* 285: 157-168.

682 Kerje, S., P. Sharma, U. Gunnarsson, H. Kim, S. Bagchi *et al.*, 2004 The Dominant white,  
683 Dun and Smoky color variants in chicken are associated with insertion/deletion  
684 polymorphisms in the PMEL17 gene. *Genetics* 168: 1507-1518.

685 Kidson, S. H., and B. C. Fabian, 1981 The effect of temperature on tyrosinase activity in  
686 Himalayan mouse skin. *J Exp Zool* 215: 91-97.

687 Kobayashi, T., G. Imokawa, D. C. Bennett and V. J. Hearing, 1998 Tyrosinase stabilization  
688 by Tyrp1 (the brown locus protein). *J Biol Chem* 273: 31801-31805.

689 Koike, C., T. Numata, H. Ueda, Y. Mori and T. Furukawa, 2010 TRPM1: a vertebrate TRP  
690 channel responsible for retinal ON bipolar function. *Cell Calcium* 48: 95-101.

691 Kuhn, C., and R. Weikard, 2007 An investigation into the genetic background of coat colour  
692 dilution in a Charolais x German Holstein F2 resource population. *Anim Genet* 38:  
693 109-113.

694 Lalueza-Fox, C., H. Rompler, D. Caramelli, C. Staubert, G. Catalano *et al.*, 2007 A  
695 melanocortin 1 receptor allele suggests varying pigmentation among Neanderthals.  
696 *Science* 318: 1453-1455.

697 Lamoreux, M. L., K. Wakamatsu and S. Ito, 2001 Interaction of major coat color gene  
698 functions in mice as studied by chemical analysis of eumelanin and pheomelanin.  
699 *Pigment Cell Res* 14: 23-31.

Li, M. H., T. Tiirikka and J. Kantanen, 2014 A genome-wide scan study identifies a single nucleotide substitution in ASIP associated with white versus non-white coat-colour variation in sheep (*Ovis aries*). *Heredity* (Edinb) 112: 122-131.

Li, S., C. Wang, W. Yu, S. Zhao and Y. Gong, 2012 Identification of genes related to white and black plumage formation by RNA-Seq from white and black feather bulbs in ducks. *PLoS One* 7: e36592.

MacDougall-Shackleton, E. A., L. Blanchard, S. A. Igodura and H. L. Gibbs, 2003 Unmelanized plumage patterns in Old World leaf warblers do not correspond to sequence variation at the melanocortin-1 receptor locus (MC1R). *Mol Biol Evol* 20: 1675-1681.

Marshall, R. A., C. E. Aitken, M. Dorywalska and J. D. Puglisi, 2008 Translation at the single-molecule level. *Annu Rev Biochem* 77: 177-203.

Minvielle, F., B. Bed'hom, J. L. Coville, S. Ito, M. Inoue-Murayama *et al.*, 2010 The "silver" Japanese quail and the MITF gene: causal mutation, associated traits and homology with the "blue" chicken plumage. *BMC Genet* 11: 15.

Mogosan, G. D., A. M. Grumezescu and M. C. Chifiriuc, 2014 Keratin-based biomaterials for biomedical applications. *Curr Drug Targets* 15: 518-530.

Nan, H., P. Kraft, D. J. Hunter and J. Han, 2009 Genetic variants in pigmentation genes, pigmentary phenotypes, and risk of skin cancer in Caucasians. *Int J Cancer* 125: 909-917.

Nicoloso, L., R. Negrini, P. Ajmone-Marsan and P. Crepaldi, 2012 On the way to functional agro biodiversity: coat colour gene variability in goats. *Animal* 6: 41-49.

Norris, B. J., and V. A. Whan, 2008 A gene duplication affecting expression of the ovine ASIP gene is responsible for white and black sheep. *Genome Res* 18: 1282-1293.

Oancea, E., J. Vriens, S. Brauchi, J. Jun, I. Splawski *et al.*, 2009 TRPM1 forms ion channels associated with melanin content in melanocytes. *Sci Signal* 2: ra21.

Ozsolak, F., and P. M. Milos, 2011 RNA sequencing: advances, challenges and opportunities. *Nat Rev Genet* 12: 87-98.

Patterson, A., A. Karsi, J. Feng and Z. Liu, 2003 Translational machinery of channel catfish: II. Complementary DNA and expression of the complete set of 47 60S ribosomal proteins. *Gene* 305: 151-160.

Penagaricano, F., P. Zorrilla, H. Naya, C. Robello and J. I. Urioste, 2012 Gene expression analysis identifies new candidate genes associated with the development of black skin spots in Corriedale sheep. *J Appl Genet* 53: 99-106.

Roberts, D. W., R. A. Newton, K. A. Beaumont, J. Helen Leonard and R. A. Sturm, 2006 Quantitative analysis of MC1R gene expression in human skin cell cultures. *Pigment Cell Res* 19: 76-89.

Schaffler, A., J. Scholmerich and C. Buechler, 2006 The role of 'adipotropins' and the clinical importance of a potential hypothalamic-pituitary-adipose axis. *Nat Clin Pract Endocrinol Metab* 2: 374-383.

Slominski, A., D. J. Tobin, S. Shibahara and J. Wortsman, 2004 Melanin pigmentation in mammalian skin and its hormonal regulation. *Physiol Rev* 84: 1155-1228.

Solano, F., S. Briganti, M. Picardo and G. Ghanem, 2006 Hypopigmenting agents: an updated review on biological, chemical and clinical aspects. *Pigment Cell Res* 19:

744 550-571.

745 Steinert, P. M., D. A. Parry and L. N. Marekov, 2003 Trichohyalin mechanically strengthens

746 the hair follicle: multiple cross-bridging roles in the inner root sheath. *J Biol Chem* 278:

747 41409-41419.

748 Steingrimsdottir, E., N. G. Copeland and N. A. Jenkins, 2006 Mouse coat color mutations:

749 from fancy mice to functional genomics. *Dev Dyn* 235: 2401-2411.

750 Sturm, R. A., and D. L. Duffy, 2012 Human pigmentation genes under environmental

751 selection. *Genome Biol* 13: 248.

752 Sulem, P., D. F. Gudbjartsson, S. N. Stacey, A. Helgason, T. Rafnar *et al.*, 2007 Genetic

753 determinants of hair, eye and skin pigmentation in Europeans. *Nat Genet* 39:

754 1443-1452.

755 Theos, A. C., S. T. Truschel, G. Raposo and M. S. Marks, 2005 The Silver locus product

756 Pmel17/gp100/Silv/ME20: controversial in name and in function. *Pigment Cell Res* 18:

757 322-336.

758 Tsukamoto, K., I. J. Jackson, K. Urabe, P. M. Montague and V. J. Hearing, 1992 A second

759 tyrosinase-related protein, TRP-2, is a melanogenic enzyme termed DOPAchrome

760 tautomerase. *EMBO J* 11: 519-526.

761 Vage, D. I., H. Klungland, D. Lu and R. D. Cone, 1999 Molecular and pharmacological

762 characterization of dominant black coat color in sheep. *Mamm Genome* 10: 39-43.

763 van Genderen, M. M., M. M. Bijveld, Y. B. Claassen, R. J. Florijn, J. N. Pearing *et al.*, 2009

764 Mutations in TRPM1 are a common cause of complete congenital stationary night

765 blindness. *Am J Hum Genet* 85: 730-736.

766 Wade, C. M., E. Giulotto, S. Sigurdsson, M. Zoli, S. Gnerre *et al.*, 2009 Genome sequence,

767 comparative analysis, and population genetics of the domestic horse. *Science* 326:

768 865-867.

769 Wang, L., J. Fan, M. Yu, S. Zheng and Y. Zhao, 2011a Association of goat (*Capra hircus*)

770 CD4 gene exon 6 polymorphisms with ability of sperm internalizing exogenous DNA.

771 *Mol Biol Rep* 38: 1621-1628.

772 Wang, P. Q., L. M. Deng, B. Y. Zhang, M. X. Chu and J. Z. Hou, 2011b Polymorphisms of the

773 cocaine-amphetamine-regulated transcript (CART) gene and their association with

774 reproductive traits in Chinese goats. *Genet Mol Res* 10: 731-738.

775 Wang, Z., M. Gerstein and M. Snyder, 2009 RNA-Seq: a revolutionary tool for

776 transcriptomics. *Nat Rev Genet* 10: 57-63.

777 Westerberg, R., P. Tvrdik, A. B. Unden, J. E. Mansson, L. Norlen *et al.*, 2004 Role for

778 ELOVL3 and fatty acid chain length in development of hair and skin function. *J Biol*

779 *Chem* 279: 5621-5629.

780 Wilhelm, B. T., and J. R. Landry, 2009 RNA-Seq-quantitative measurement of expression

781 through massively parallel RNA-sequencing. *Methods* 48: 249-257.

782 Xu, T., X. Guo, H. Wang, F. Hao, X. Du *et al.*, 2013 Differential gene expression analysis

783 between anagen and telogen of *Capra hircus* skin based on the de novo assembled

784 transcriptome sequence. *Gene* 520: 30-38.

785 Zhang, J., F. Liu, J. Cao and X. Liu, 2015 Skin transcriptome profiles associated with skin

786 color in chickens. *PLoS One* 10: e0127301.

787 Zuber, M., F. Zia, K. M. Zia, S. Tabasum, M. Salman *et al.*, 2015 Collagen based

788 polyurethanes-A review of recent advances and perspective. Int J Biol Macromol 80:  
789 366-374.  
790

# 791 **Figure captions.**

792 **Figure 1. Classification of total raw reads pairs of different coat colors goat skin.** After  
793 filtering the only adaptor sequences, containing N sequences and low quality sequences, the  
794 three RNA-Seq libraries still generated over 26 million clean reads pairs in each library, and  
795 the percentage of clean reads among raw tags in each library ranged from 94.07% to 94.71%.

796 **Figure 2. Percent of reads mapped to genome regions.** The reads mapped to genome  
797 regions including exon, intron and intergenic.

798 **Figure 3. The numbers of DEGs between the three different coat colors goat skin.**  
799 Between the gray skin and white skin libraries, there were 74 upregulated genes and 17  
800 downregulated genes; Between the brown skin and white skin libraries, there were 23  
801 upregulated genes and 44 downregulated genes, while there were 33 upregulated genes and  
802 121 downregulated genes between the brown skin and gray skin libraries.

803 **Figure 4. GO functional analysis of DEGs based on RNA-Seq data.** The results were  
804 summarised the most enriched GO terms in three main categories: biological process, cellular  
805 component and molecular function.

806 **Figure 5 The qPCR validation of differentially expressed genes in the three different**  
807 **coat colors goat skin.** Abundance of target genes was normalized relative to abundance of  
808 *GAPDH* gene. Bars in each panel represent the mean  $\pm$  standard error (n = 3).  
809

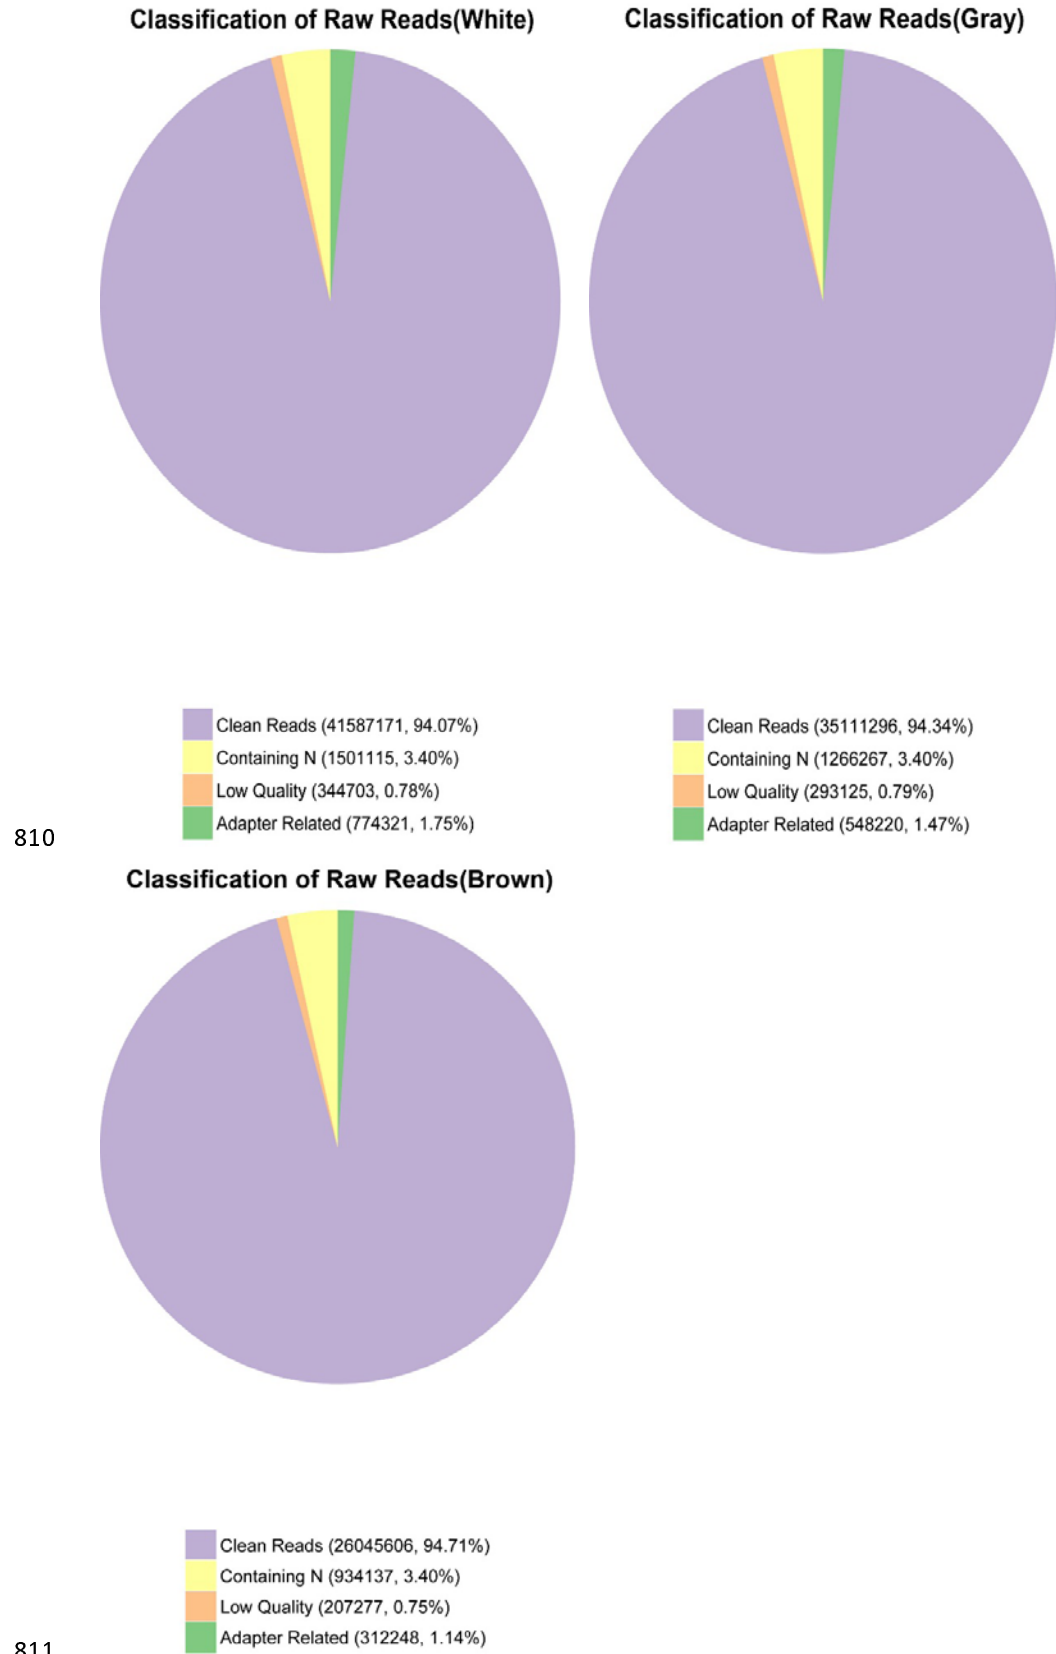

**Figure 1**

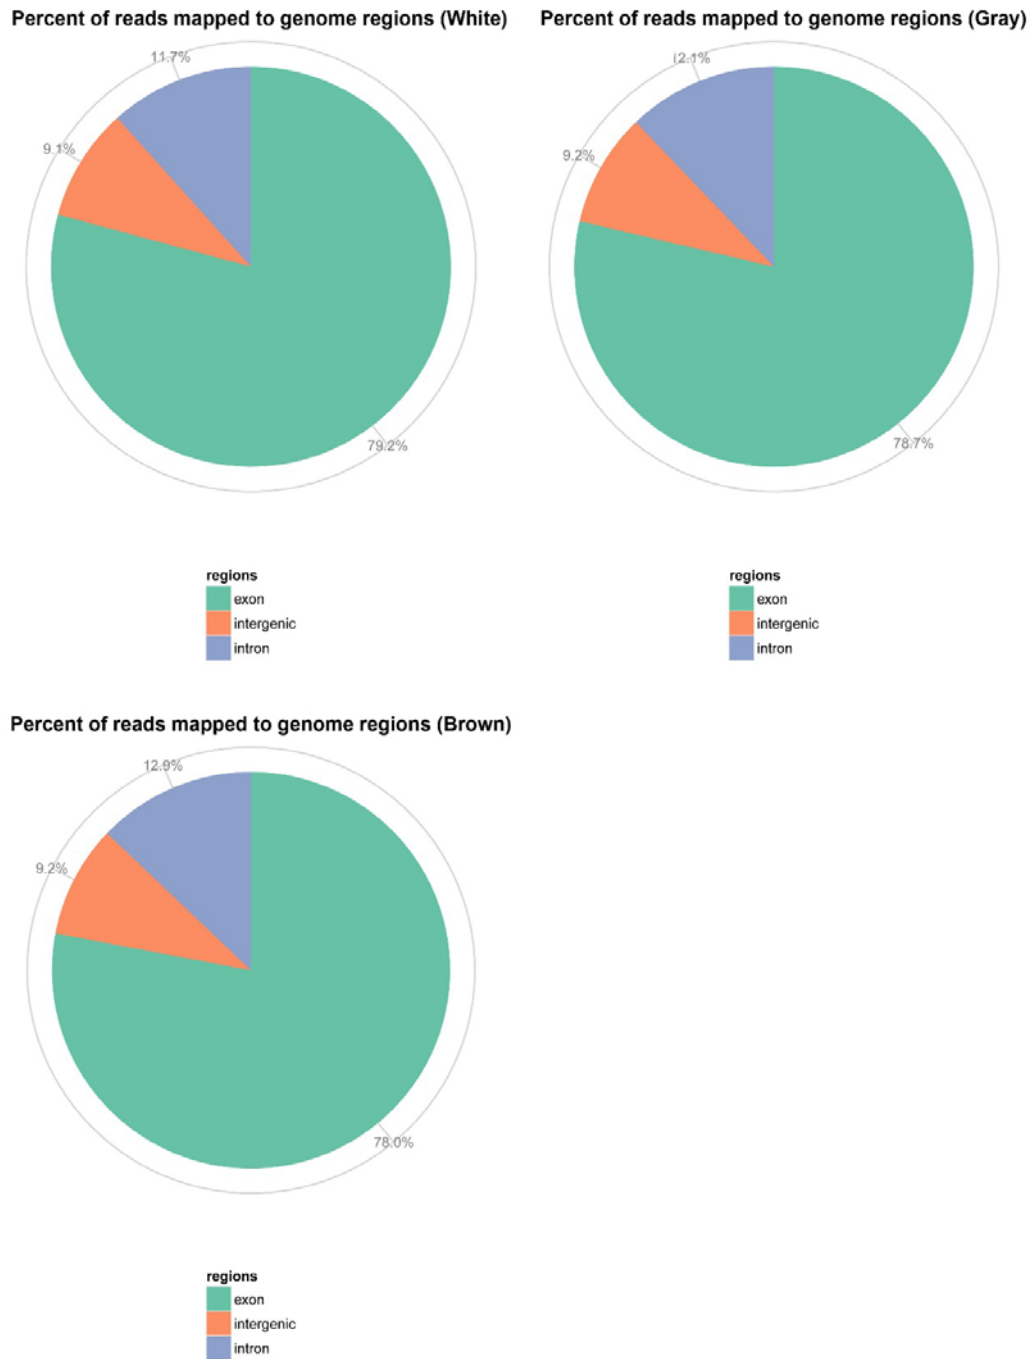

**Figure 2**

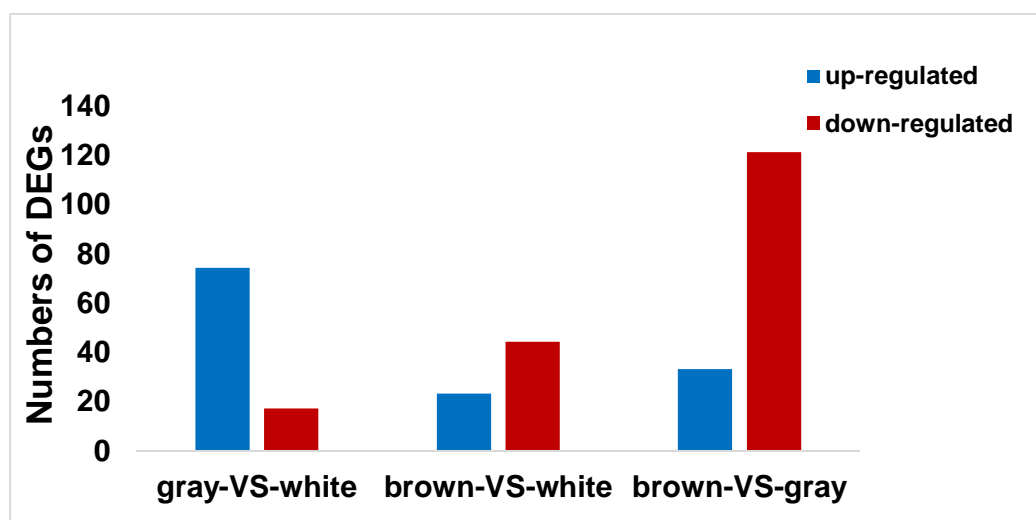

**Figure 3**



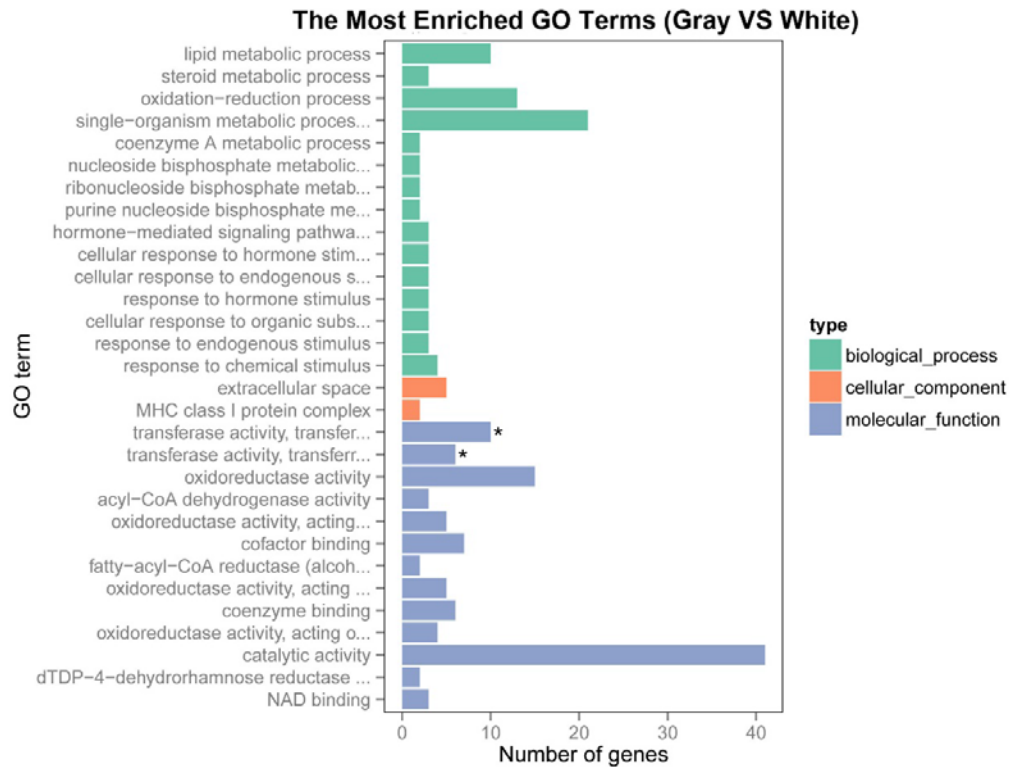

828

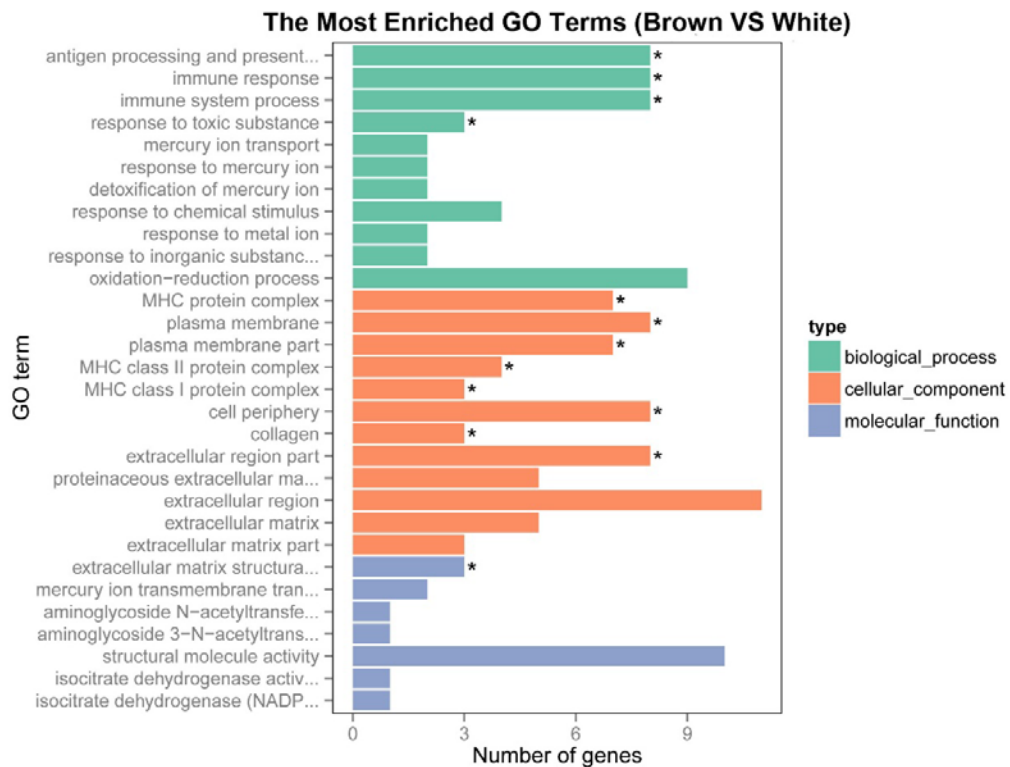

829

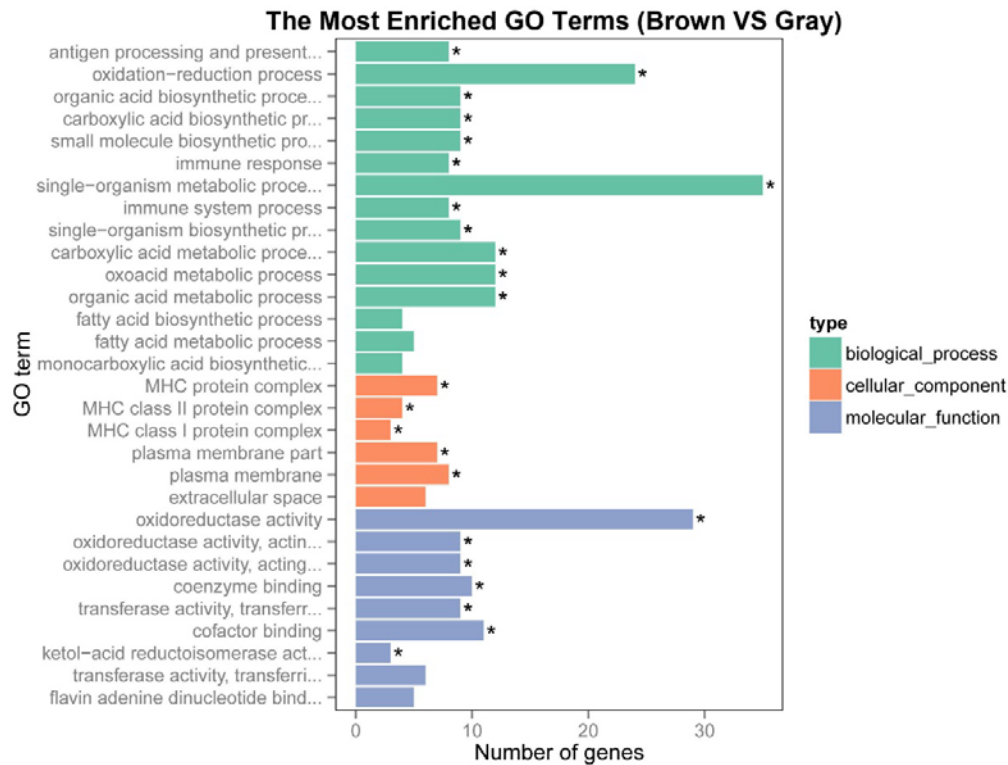

830

831

832 **Figure 4**

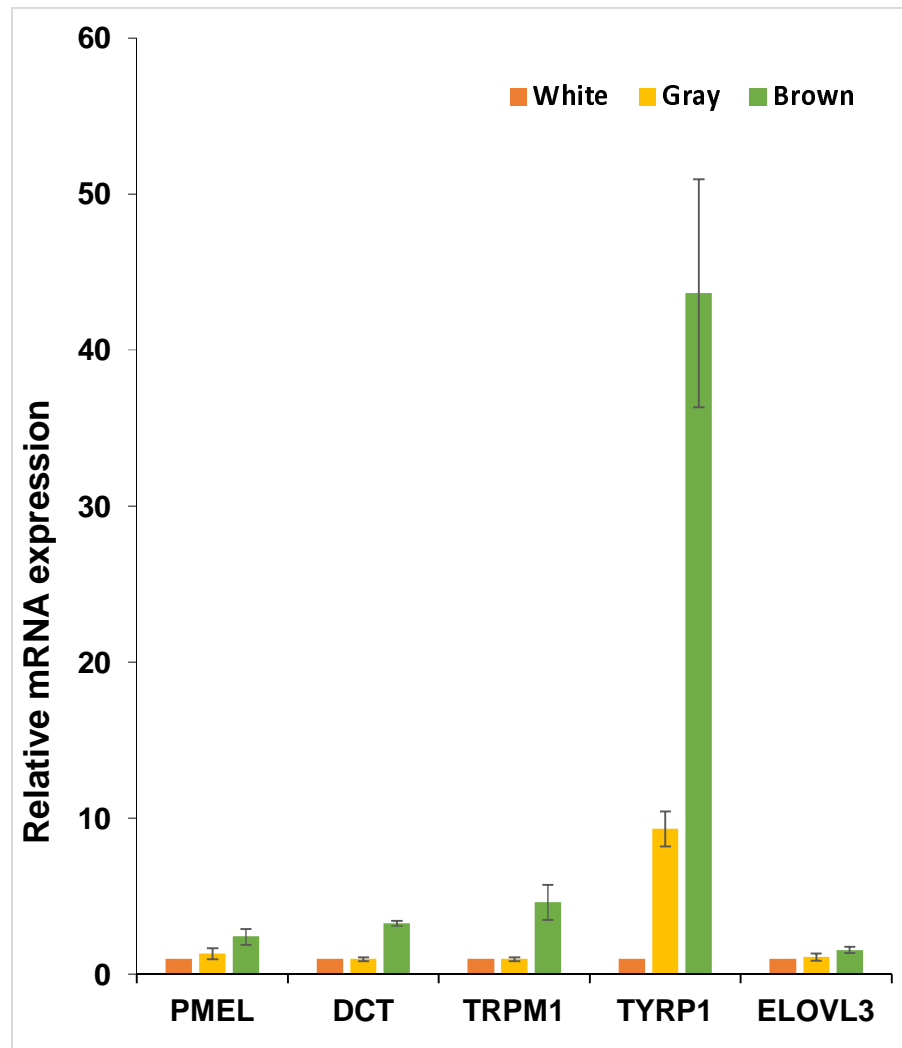

**Figure 5**

846     **Table captions**

847     **Table 1. Information regarding the specific primers used for the qPCR.**

848     **Table 2. Quality Control of the Sequencing Data**

849     **Table 3. Summary of read numbers based on the RNA-Seq data from different coat**  
850     **colors goat skin.**

851

852

853

854

855

856

857

858

859

860

861

862

863

864

865

866

867

868

869

870

871

872 **Table 1**

| Primer        | Sequences (5'→3')               | GenBank<br>accession number | Product<br>Length (bp) |
|---------------|---------------------------------|-----------------------------|------------------------|
| <i>PMEL</i>   | Forward: AGAGACTACCATTGCCTGAAA  | XM_005680385.1              | 126                    |
|               | Reverse: TCCTTGGGTTGGGAAGAG     |                             |                        |
| <i>TRPM1</i>  | Forward: GTGTCTGGAATTACAATGGAAG | XM_005695175.1              | 131                    |
|               | Reverse: CTAGATGACCAAGATGGAGCT  |                             |                        |
| <i>DCT</i>    | Forward: CACCCTTAACGGAGACACA    | XM_005687699.1              | 106                    |
|               | Reverse: TAGGTCAGAACTACGGCTTG   |                             |                        |
| <i>TYRP1</i>  | Forward: TCTTGTCTGATTCGTGCCA    | NM_001285727.1              | 114                    |
|               | Reverse: AGACTGATTAGGGTTATGGATT |                             |                        |
| <i>ELOVL3</i> | Forward: GTCGGTATCCTGGCTTAT     | XM_005698356.1              | 168                    |
|               | Reverse: TCACTGGCTCTTGGTCTT     |                             |                        |
| <i>GAPDH</i>  | Forward: AGTTCCACGGCACAGTCAAG   | AJ431207.1                  | 117                    |
|               | Reverse: ACTCAGCACCAGCATCACC    |                             |                        |

873

874

875

876

877

878

879

880

881

882

883

884

885

886

887

888 **Table 2**

| Sample name | Raw reads | Clean reads | clean bases | Error rate(%) | Q20(%) | Q30(%) | GC content(%) |
|-------------|-----------|-------------|-------------|---------------|--------|--------|---------------|
| White_1     | 44207310  | 41587171    | 5.2G        | 0.04          | 94.95  | 89.92  | 51.36         |
| White_2     | 44207310  | 41587171    | 5.2G        | 0.04          | 93.45  | 87.66  | 51.35         |
| Gray_1      | 37218908  | 35111296    | 4.39G       | 0.04          | 94.79  | 89.62  | 51.39         |
| Gray_2      | 37218908  | 35111296    | 4.39G       | 0.04          | 93.28  | 87.37  | 51.45         |
| Brown_1     | 27499268  | 26045606    | 3.26G       | 0.04          | 94.99  | 89.99  | 51.51         |
| Brown_2     | 27499268  | 26045606    | 3.26G       | 0.04          | 93.48  | 87.74  | 51.50         |

889 Raw reads: the numbers of original data; Clean reads: the numbers of after filtering the original

890 data; Error rate: Phred score, Qphred =  $-10\log_{10}(e)$ ; Q20、Q30: the percent of the bases of

891 Qphred>20 or 30 in the total bases.

892

893

894

895

896

897

898

899

900

901

902

903

904

905

906

907

908 **Table 3**

| <b>Sample_name</b> | <b>White</b>      | <b>Gray</b>       | <b>Brown</b>      |
|--------------------|-------------------|-------------------|-------------------|
| Total reads        | 83174342          | 70222592          | 52091212          |
| Total mapped       | 65032149 (78.19%) | 54279674 (77.3%)  | 40999750 (78.71%) |
| Multiple mapped    | 1350169 (1.62%)   | 1123310 (1.6%)    | 833097 (1.6%)     |
| Uniquely mapped    | 63681980 (76.56%) | 53156364 (75.7%)  | 40166653 (77.11%) |
| Non-splice reads   | 39477742 (47.46%) | 33330204 (47.46%) | 25547588 (49.04%) |
| Splice reads       | 24204238 (29.1%)  | 19826160 (28.23%) | 14619065 (28.06%) |

909

910
